# Supplementary material for: Treatment- and Symptom-Related Determinants of Health-Related Quality of Life in Patients with Oropharyngeal Cancer
Source: Research Square preprint supplement (doi:10.21203/rs.3.rs-7997928/v1), 2025-12-30
Supplement: Supplementary file 1 [file 1bf568d94b384cb4df82a562.docx]

Additional file 1. Health-related quality of life based on symptoms and sex in patients with oropharyngeal cancer

| Symptoma, b | Category | Male (n = 278) | | Female (n = 49) | | P-value (sex) | P-value (symptom) | P-value (interaction) |
| --- | --- | --- | --- | --- | --- | --- | --- | --- |
| **N (%)** | **EQ-5D-5L index**  **(Mean ± SD)** | **N (%)** | **EQ-5D-5L index**  **(Mean ± SD)** |
| Nausea and vomiting | None | 187 (73.3%) | 0.891 ± 0.126 | 33 (68.8%) | 0.818 ± 0.102 | 0.026* | 0.000*** | 0.271 |
| Mild | 41 (16.1%) | 0.839 ± 0.116 | 5 (10.4%) | 0.884 ± 0.067 |
| Moderate | 23 (9.0%) | 0.725 ± 0.191 | 8 (16.7%) | 0.715 ± 0.303 |
| Severe | 4 (1.6%) | 0.617 ± 0.064 | 2 (4.2%) | 0.632 ± 0.120 |
| Dyspnea | None | 164 (64.3%) | 0.912 ± 0.097 | 23 (48.9%) | 0.813 ± 0.114 | 0.414 | 0.000*** | 0.014* |
| Mild | 0 (0.0%) | - | 0 (0.0%) | - |
| Moderate | 75 (29.4%) | 0.814 ± 0.120 | 19 (40.4%) | 0.822 ± 0.112 |
| Severe | 16 (6.3%) | 0.597 ± 0.240 | 5 (10.6%) | 0.638 ± 0.355 |
| Insomnia | None | 125 (49.0%) | 0.916 ± 0.120 | 14 (29.2%) | 0.856 ± 0.079 | 0.359 | 0.000*** | 0.648 |
| Mild | 0 (0.0%) | - | 0 (0.0%) | - |
| Moderate | 84 (32.9%) | 0.855 ± 0.107 | 24 (50.0%) | 0.825 ± 0.092 |
| Severe | 46 (18.0%) | 0.737 ± 0.172 | 10 (20.8%) | 0.661 ± 0.267 |
| Constipation | None | 154 (60.4%) | 0.891 ± 0.130 | 22 (45.8%) | 0.854 ± 0.064 | 0.873 | 0.004 ** | 0.973 |
| Mild | 0 (0.0%) | - | 0 (0.0%) | - |
| Moderate | 74 (29.0%) | 0.854 ± 0.131 | 14 (29.2%) | 0.811 ± 0.103 |
| Severe | 27 (10.6%) | 0.736 ± 0.170 | 12 (25.0%) | 0.686 ± 0.256 |
| Diarrhea | None | 193 (75.7%) | 0.888 ± 0.121 | 35 (72.9%) | 0.801 ± 0.167 | 0.846 | 0.020 * | 0.039* |
| Mild | 0 (0.0%) | - | 0 (0.0%) | - |
| Moderate | 54 (21.2%) | 0.787 ± 0.179 | 10 (20.8%) | 0.835 ± 0.092 |
| Severe | 8 (3.1%) | 0.784 ± 0.164 | 3 (6.2%) | 0.663 ± 0.187 |
| Dysphagia | None | 104 (40.8%) | 0.929 ± 0.086 | 17 (35.4%) | 0.838 ± 0.128 | 0.004** | 0.000*** | 0.001*** |
| Mild | 94 (36.9%) | 0.884 ± 0.101 | 15 (31.2%) | 0.841 ± 0.033 |
| Moderate | 34 (13.3%) | 0.744 ± 0.131 | 13 (27.1%) | 0.794 ± 0.104 |
| Severe | 23 (9.0%) | 0.662 ± 0.211 | 3 (6.2%) | 0.405 ± 0.347 |
| Sensory problems | None | 129 (50.6%) | 0.894 ± 0.145 | 23 (47.9%) | 0.837 ± 0.110 | 0.019* | 0.000*** | 0.928 |
| Mild | 41 (16.1%) | 0.902 ± 0.098 | 5 (10.4%) | 0.846 ± 0.041 |
| Moderate | 67 (26.3%) | 0.812 ± 0.117 | 13 (27.1%) | 0.784 ± 0.112 |
| Severe | 18 (7.1%) | 0.748 ± 0.186 | 7 (14.6%) | 0.676 ± 0.313 |
| Speech problems | None | 118 (46.3%) | 0.918 ± 0.102 | 18 (37.5%) | 0.840 ± 0.114 | 0.003** | 0.000*** | 0.002** |
| Mild | 76 (29.8%) | 0.872 ± 0.120 | 17 (35.4%) | 0.829 ± 0.094 |
| Moderate | 42 (16.5%) | 0.765 ± 0.142 | 10 (20.8%) | 0.796 ± 0.077 |
| Severe | 19 (7.5%) | 0.709 ± 0.216 | 3 (6.2%) | 0.405 ± 0.347 |
| Social eating difficulty | None | 111 (43.5%) | 0.940 ± 0.080 | 19 (39.6%) | 0.835 ± 0.121 | 0.003** | 0.000*** | 0.178 |
| Mild | 60 (23.5%) | 0.872 ± 0.124 | 11 (22.9%) | 0.853 ± 0.060 |
| Moderate | 48 (18.8%) | 0.785 ± 0.154 | 11 (22.9%) | 0.778 ± 0.093 |
| Severe | 36 (14.1%) | 0.720 ± 0.146 | 7 (14.6%) | 0.655 ± 0.309 |
| Social contact difficulty | None | 143 (56.1%) | 0.923 ± 0.100 | 29 (60.4%) | 0.853 ± 0.074 | 0.001** | 0.000*** | 0.421 |
| Mild | 65 (25.5%) | 0.843 ± 0.124 | 12 (25.0%) | 0.758 ± 0.132 |
| Moderate | 32 (12.5%) | 0.758 ± 0.115 | 2 (4.2%) | 0.823 ± 0.008 |
| Severe | 15 (5.9%) | 0.614 ± 0.193 | 5 (10.4%) | 0.579 ± 0.343 |
| Reduced sexuality | None | 140 (54.9%) | 0.901 ± 0.119 | 29 (60.4%) | 0.812 ± 0.175 | 0.004** | 0.000*** | 0.181 |
| Mild | 17 (6.7%) | 0.881 ± 0.152 | 3 (6.2%) | 0.850 ± 0.030 |
| Moderate | 69 (27.1%) | 0.824 ± 0.131 | 6 (12.5%) | 0.717 ± 0.152 |
| Severe | 29 (11.4%) | 0.768 ± 0.198 | 10 (20.8%) | 0.800 ± 0.124 |
| Dental problems | None | 129 (50.8%) | 0.899 ± 0.133 | 24 (50.0%) | 0.808 ± 0.110 | 0.085 | 0.000*** | 0.227 |
| Mild | 0 (0.0%) | - | 0 (0.0%) | - |
| Moderate | 76 (29.9%) | 0.856 ± 0.137 | 8 (16.7%) | 0.824 ± 0.053 |
| Severe | 49 (19.3%) | 0.783 ± 0.145 | 16 (33.3%) | 0.776 ± 0.239 |
| Trismus | None | 155 (61.0%) | 0.912 ± 0.103 | 31 (64.6%) | 0.835 ± 0.097 | 0.340 | 0.000*** | 0.531 |
| Mild | 0 (0.0%) | - | 0 (0.0%) | - |
| Moderate | 66 (26.0%) | 0.828 ± 0.138 | 9 (18.8%) | 0.769 ± 0.098 |
| Severe | 33 (13.0%) | 0.710 ± 0.182 | 8 (16.7%) | 0.697 ± 0.310 |
| Xerostomia | None | 68 (26.7%) | 0.928 ± 0.091 | 5 (10.4%) | 0.813 ± 0.070 | 0.956 | 0.000*** | 0.484 |
| Mild | 0 (0.0%) | - | 0 (0.0%) | - |
| Moderate | 103 (40.4%) | 0.865 ± 0.141 | 16 (33.3%) | 0.832 ± 0.120 |
| Severe | 84 (32.9%) | 0.809 ± 0.158 | 27 (56.2%) | 0.778 ± 0.186 |
| Sticky saliva | None | 117 (45.9%) | 0.909 ± 0.110 | 22 (45.8%) | 0.835 ± 0.114 | 0.410 | 0.000*** | 0.685 |
| Mild | 0 (0.0%) | - | 0 (0.0%) | - |
| Moderate | 75 (29.4%) | 0.868 ± 0.140 | 9 (18.8%) | 0.833 ± 0.046 |
| Severe | 63 (24.7%) | 0.774 ± 0.158 | 17 (35.4%) | 0.736 ± 0.219 |
| Coughing | None | 120 (47.1%) | 0.903 ± 0.106 | 26 (54.2%) | 0.810 ± 0.106 | 0.040* | 0.000*** | 0.011* |
| Mild | 0 (0.0%) | - | 0 (0.0%) | - |
| Moderate | 107 (42.0%) | 0.864 ± 0.132 | 8 (16.7%) | 0.835 ± 0.114 |
| Severe | 28 (11.0%) | 0.695 ± 0.192 | 14 (29.2%) | 0.761 ± 0.242 |

SD, standard deviation; EQ-5D-5L, EuroQol five-dimension five-level

aVariables with percentage totals below 100% indicate the presence of missing data.

bNone, mild, moderate, and severe categories were defined according to the official scoring guidelines for the EORTC QLQ-C30 and QLQ-H&N35. Raw scores were converted to a 0–100 scale and subsequently categorized as 0, 1–33, 34–66, and 67–100, respectively.

*p < 0.05, **p < 0.01, ***p < 0.001
