# Supplementary material for: Treatment- and Symptom-Related Determinants of Health-Related Quality of Life in Patients with Oropharyngeal Cancer
Source: Research Square preprint supplement (doi:10.21203/rs.3.rs-7997928/v1), 2025-12-30
Supplement: Supplementary file 2 [file a56b5a5d01fad879670a4792.docx]

Additional file 2. Institutional Review Board Approval Numbers

| Hospital | IRB Approval Number |
| --- | --- |
| Gyeong-sang National University Hospital | 2023-07-030 |
| Kyung-hee University Hospital | 2023-07-036 |
| Seoul National University Bundang Hospital | B-2308-864-303 |
| Seoul National University Hospital | 2308-153-1459 |
| Asan Medical Center | 2023-1197 |
| Chung-ang University Hospital | 2307-023-564 |
| Dan-kook University Hospital | 2023-08-024-001 |
| Korea University Ansan Hospital | 2023AS0304 |
| Han-yang University Guri Hospital | GURI 2023-08-023-001 |
| Chung-nam National University Hospital | CNUH 2023-08-041 |
| Samsung Medical Center | 2023-08-038 |
| Soon-chun-hyang University Hospital | SCHCA 2023-08-056 |
| Ewha Womans University Medical Center | 2023-09-014 |
| The Catholic University of Korea Eun-pyeong St. Mary’s Hospital | XC23QIDI0073 |
